# Supplementary material for: Inhibition of Autophagy Enhances the Antitumor Effect of Thioridazine in Acute Lymphoblastic Leukemia Cells
Source: MDPI journal article supplement (doi:10.3390/life11040365), 2021-04-20
Supplement: s1 [file s1]

# Supplementary Materials: Inhibition of Autophagy Enhances the Antitumor Effect of Thioridazine in Acute Lymphoblastic Leukemia Cells

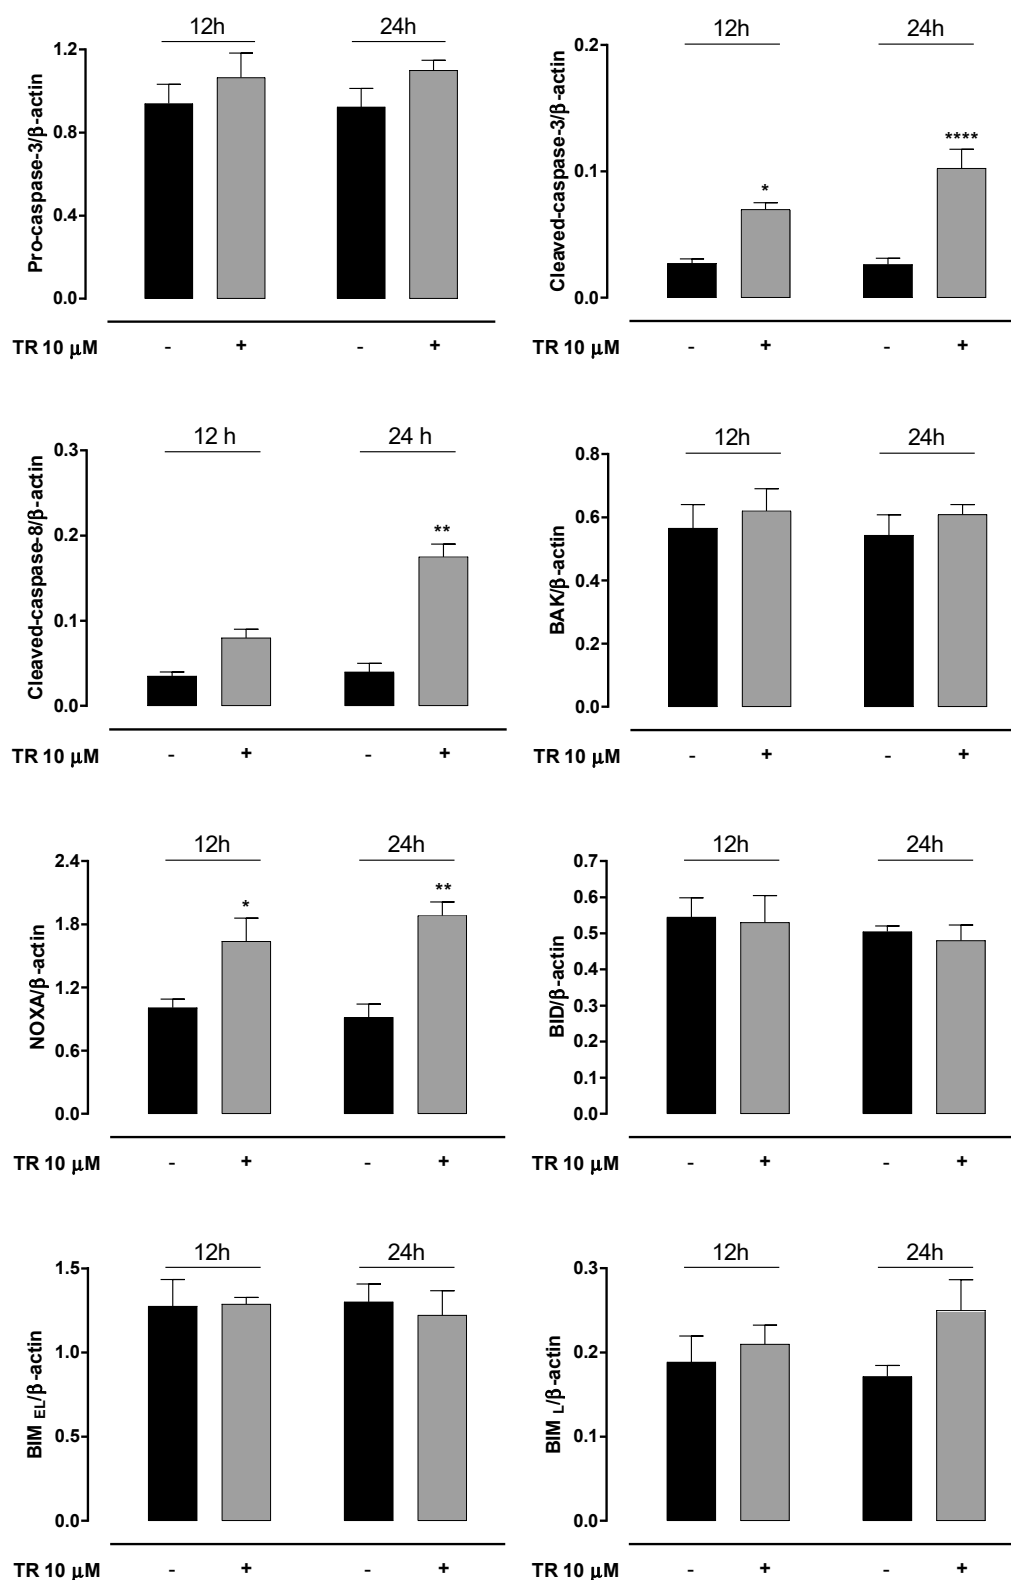

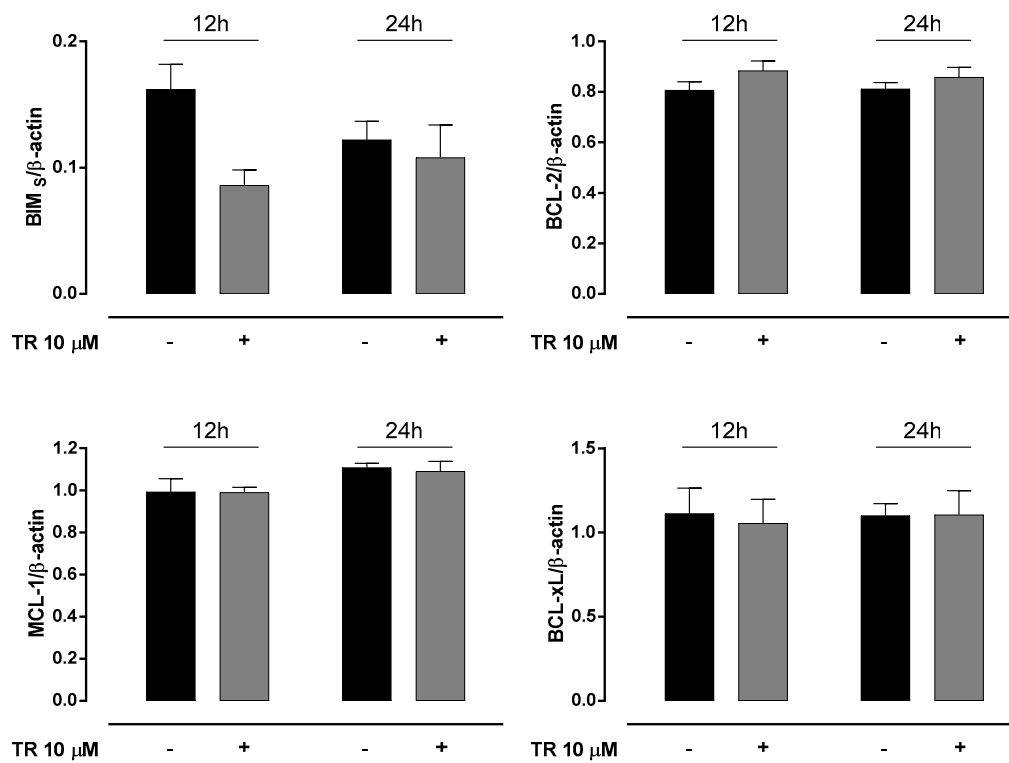

|                            | Untreated 12 h | TR 10 μM 12 h | Untreated 24 h | TR 10 μM 24 h |
|----------------------------|----------------|---------------|----------------|---------------|
| Pro-caspase-3/β-actin      | 0.94           | 1.06          | 0.92           | 1.10          |
| Cleaved-caspase-3/β-actin  | 0.02           | 0.07          | 0.02           | 0.13          |
| Cleaved-caspase-8/β-actin  | 0.03           | 0.08          | 0.04           | 0.17          |
| BAK/β-actin                | 0.57           | 0.62          | 0.54           | 0.61          |
| BAX/β-actin                | 0.00           | 0.00          | 0.00           | 0.00          |
| NOXA/β-actin               | 1.00           | 1.64          | 0.92           | 1.88          |
| BID/β-actin                | 0.54           | 0.53          | 0.50           | 0.48          |
| BIM <sub>EL</sub> /β-actin | 1.28           | 1.29          | 1.30           | 1.22          |
| BIM <sub>L</sub> /β-actin  | 0.19           | 0.21          | 0.17           | 0.25          |
| BIM <sub>S</sub> /β-actin  | 0.16           | 0.08          | 0.11           | 0.11          |
| BCL-2/β-actin              | 0.81           | 0.89          | 0.81           | 0.86          |
| MCL-1/β-actin              | 0.97           | 1.01          | 1.13           | 1.10          |
| BCL-xL/β-actin             | 1.11           | 1.05          | 1.10           | 1.10          |

(a) Densitometry Readings/intensity Ratio.

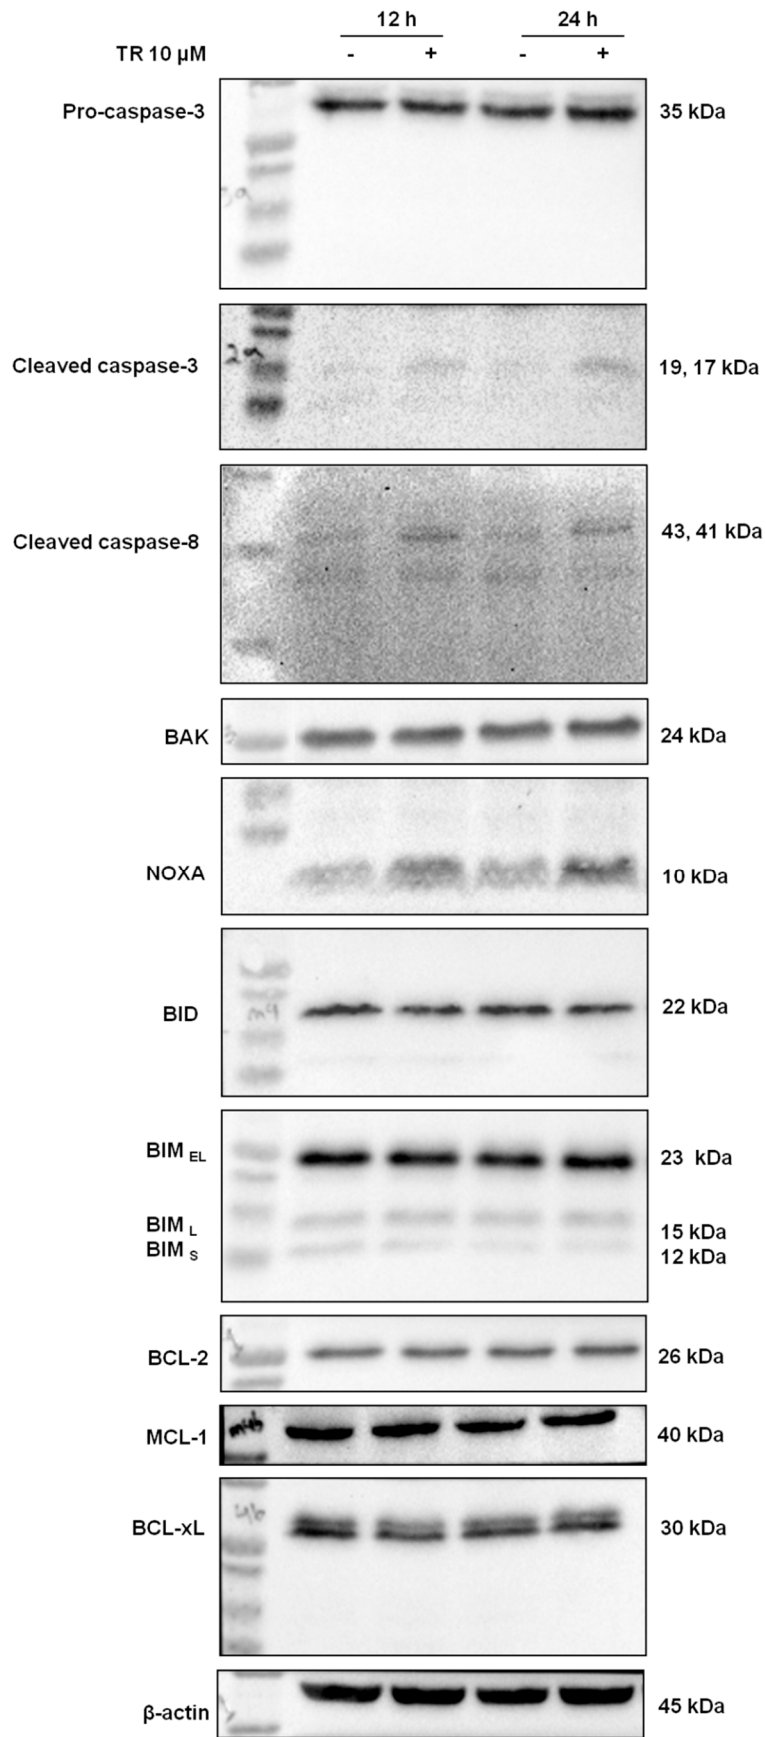

(b)

**Figure S1.** Western blots and densitometry analysis of pro-caspase-3, cleaved-caspase-3, cleaved-caspase-8, pro- and anti-apoptotic BCL-2 family proteins in Jurkat cells. Jurkat cells were treated with 10  $\mu$ M TR for 12 and 24 h. An equal amount of protein was fractionated in 12 % polyacrylamide gels and transferred to nitrocellulose membranes. Band intensities of pro-caspase-3, cleaved-caspase-3 (Asp175), cleaved-caspase-8 (Asp391), pro-apoptotic (BAK, BAX, NOXA, BID, BIM), and anti-apoptotic (BCL-2, MCL-1, BCL-xL) proteins were analyzed by (a) densitometry readings/intensity ratio, using Image Lab™ software, version 5.0 (Bio-Rad Laboratories, Inc. USA), and were normalized to the corresponding  $\beta$ -actin value and (b) immunoblots, respectively.

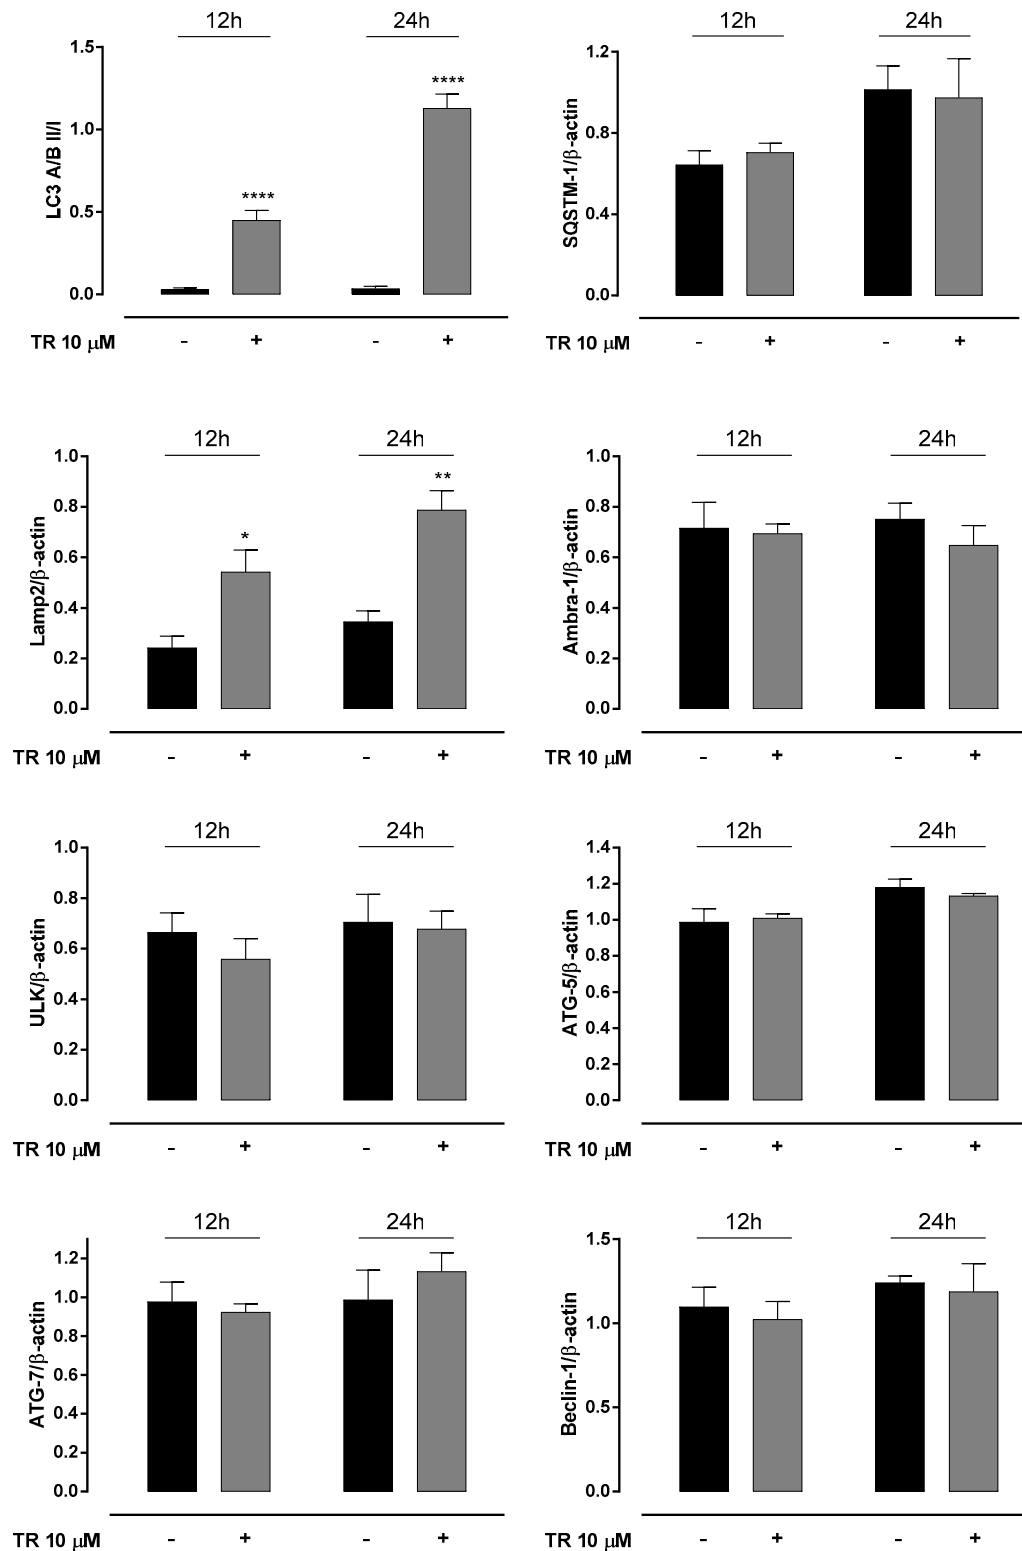

|                            | Untreated 12 h | TR 10 $\mu$ M 12 h | Untreated 24 h | TR 10 $\mu$ M 24 h |
|----------------------------|----------------|--------------------|----------------|--------------------|
| LC3 II/I                   | 0.03           | 0.45               | 0.03           | 1.13               |
| SQSTM-1/ $\beta$ -actin    | 0.64           | 0.70               | 1.01           | 0.97               |
| Lamp-2/ $\beta$ -actin     | 0.24           | 0.54               | 0.34           | 0.79               |
| Ambra-1/ $\beta$ -actin    | 0.72           | 0.69               | 0.75           | 0.65               |
| ULK/ $\beta$ -actin        | 0.67           | 0.56               | 0.70           | 0.68               |
| Atg-5/ $\beta$ -actin      | 0.99           | 1.01               | 1.18           | 1.13               |
| Atg-7/ $\beta$ -actin      | 0.98           | 0.92               | 0.99           | 1.13               |
| Beclin-1/ $\beta$ -actin   | 1.10           | 1.02               | 1.24           | 1.19               |
| p-Beclin-1/ $\beta$ -actin | 0.00           | 0.00               | 0.00           | 0.00               |

(a) Densitometry Readings/intensity Ratio.

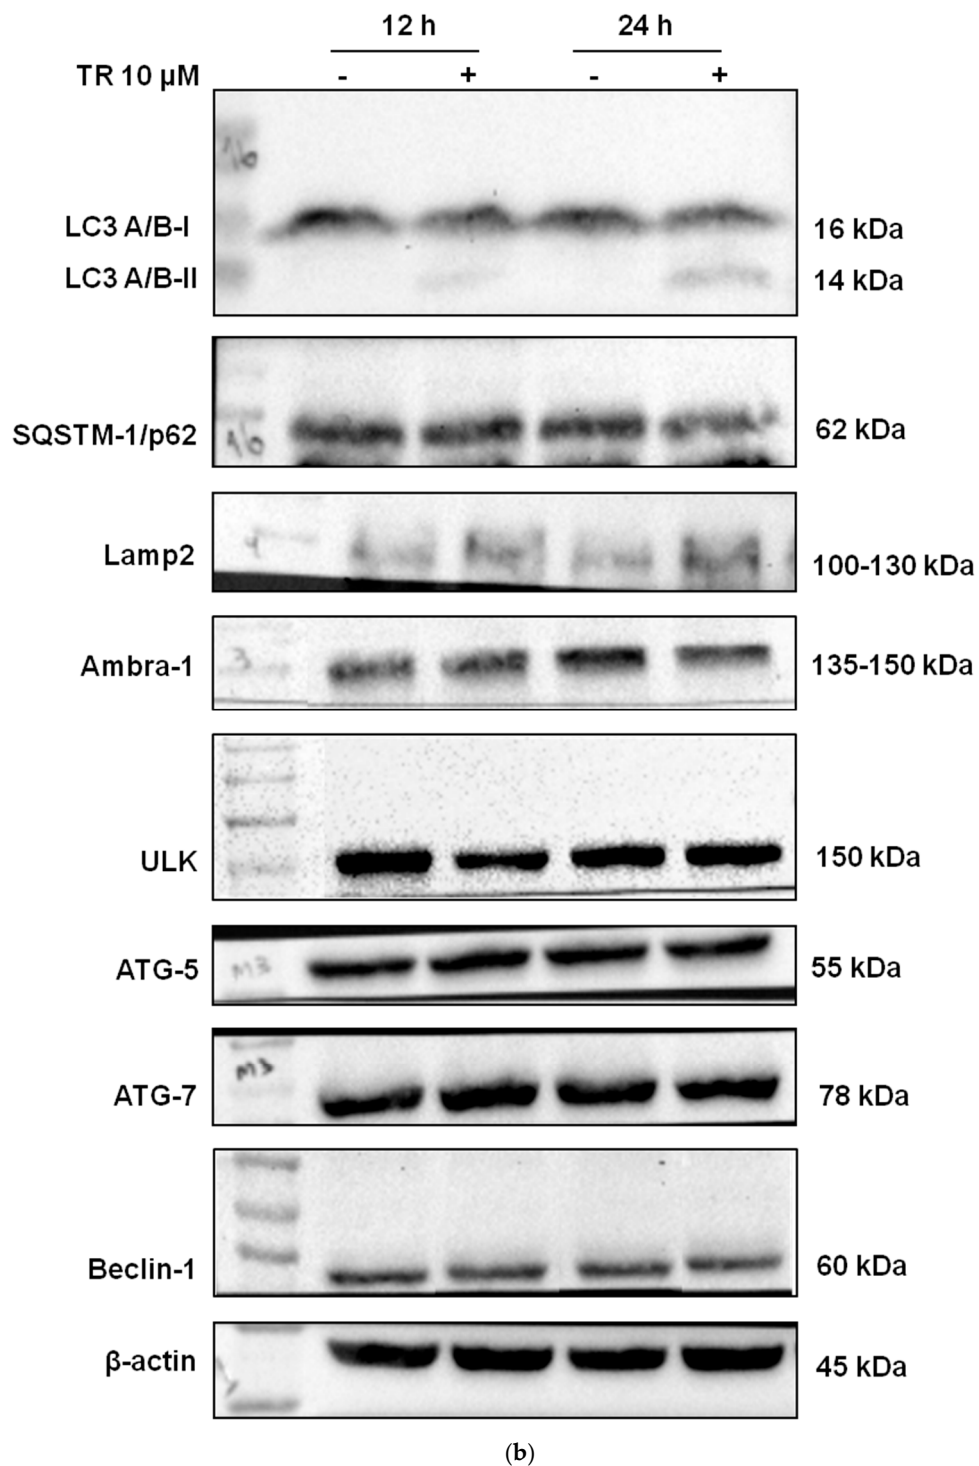

**Figure S2.** Western blots and densitometry analysis of autophagy-related proteins in Jurkat cells. Jurkat cells were treated with 10  $\mu$ M TR for 12 and 24 h. An equal amount of protein was fractionated in 12 % polyacrylamide gels and transferred to nitrocellulose membranes. Band intensities of LC3, SQSTM-1, Lamp-2, Ambra-1, ULK, Atg-5, Atg-7, Beclin-1 and p-Beclin-1 proteins were analyzed by (a) densitometry readings/intensity ratio, using Image Lab™ software, version 5.0 (Bio-Rad Laboratories, Inc. USA), and were normalized to the corresponding  $\beta$ -actin value and (b) immunoblots, respectively.

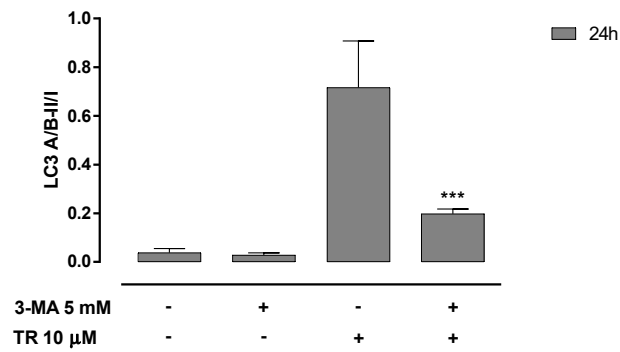

|          | Untreated | 3-MA 5 mM | TR 10 μM | 3-MA 5 mM + TR 10 μM |
|----------|-----------|-----------|----------|----------------------|
| LC3 II/I | 0.04      | 0.03      | 0.72     | 0.20                 |

(a) Densitometry Readings/intensity Ratio

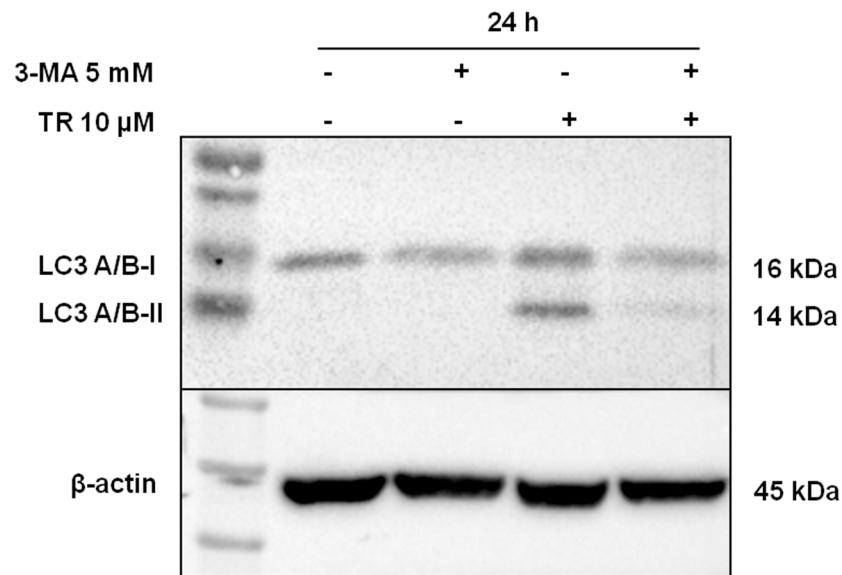

(b)

**Figure S3.** Western blots and densitometry analysis of LC3 A/B protein in Jurkat cells. Jurkat cells were pretreated with 5 mM 3-MA for 1 hour and incubated with 10 μM TR for another 24 h. An equal amount of protein was fractionated in 12 % polyacrylamide gels and transferred to nitrocellulose membranes. Band intensity of LC3 A/B protein was analyzed by (a) densitometry readings/intensity ratio, using Image Lab™ software, version 5.0 (Bio-Rad Laboratories, Inc. USA), and was normalized to the corresponding β-actin value and (b) immunoblots, respectively.

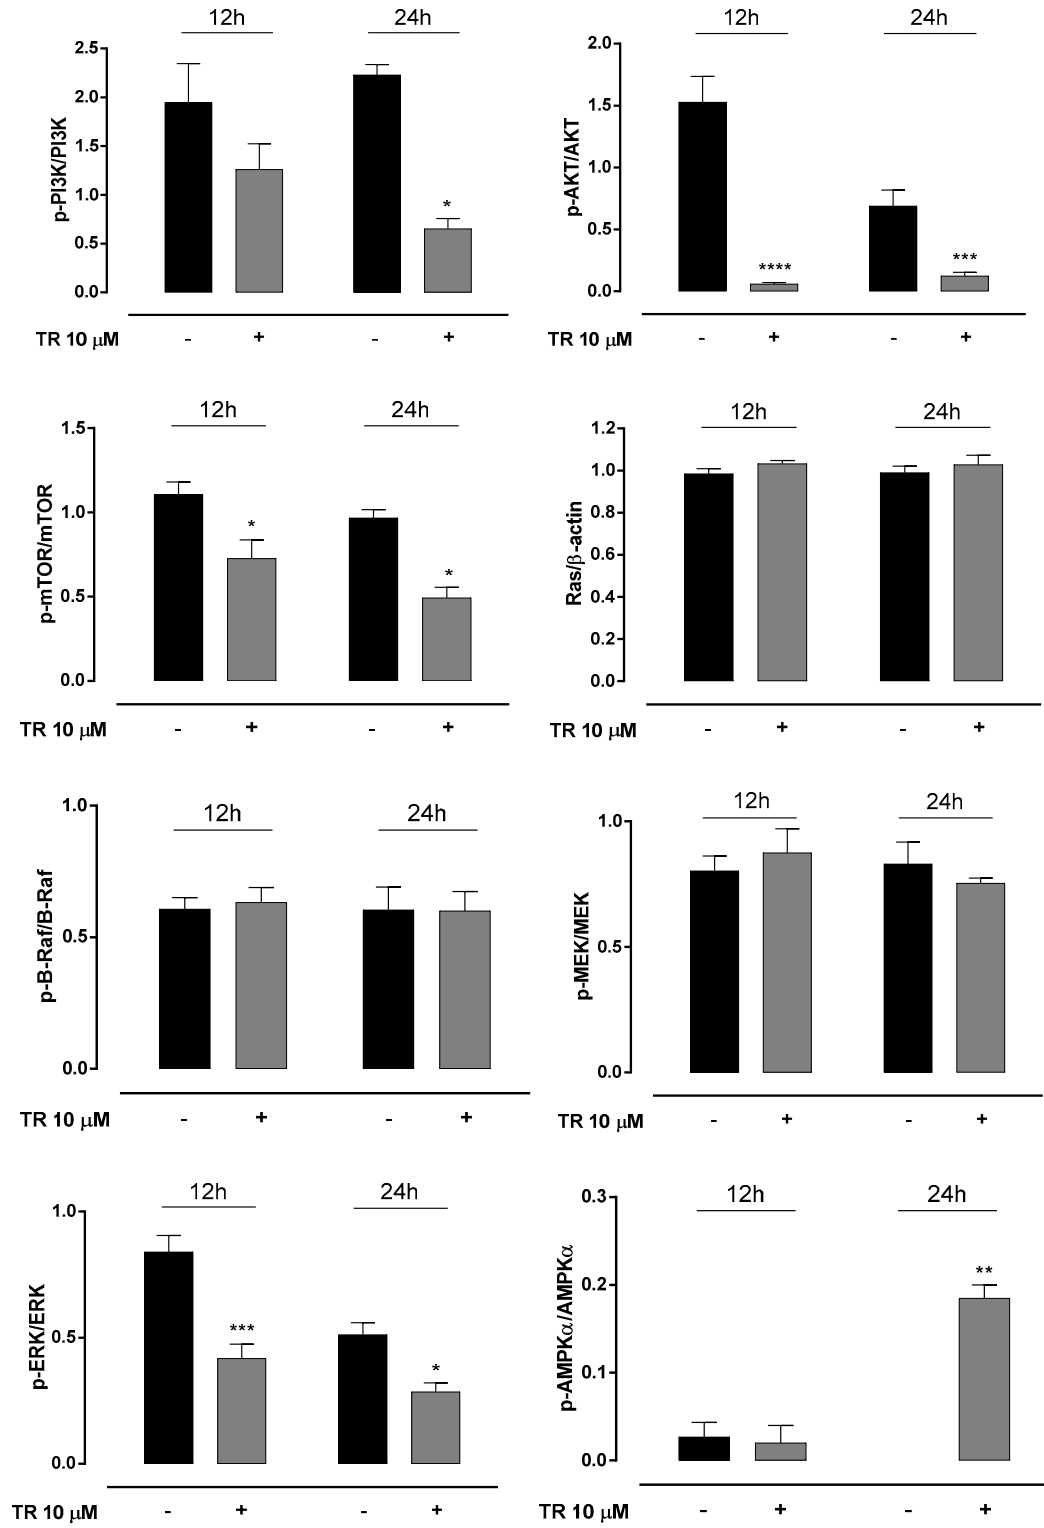



|                                | Untreated 12 h | TR 10 $\mu$ M 12 h | Untreated 24 h | TR 10 $\mu$ M 24 h |
|--------------------------------|----------------|--------------------|----------------|--------------------|
| p-PI3K/PI3K                    | 1.91           | 1.27               | 2.25           | 0.65               |
| p-AKT/AKT                      | 1.53           | 0.06               | 0.69           | 0.12               |
| p-mTOR/mTOR                    | 1.10           | 0.73               | 0.97           | 0.49               |
| Ras/ $\beta$ -actin            | 0.98           | 1.03               | 0.99           | 1.02               |
| p-B-Raf/B-Raf                  | 0.60           | 0.63               | 0.60           | 0.60               |
| p-MEK1/2/MEK1/2                | 0.80           | 0.87               | 0.83           | 0.75               |
| p-ERK1/2/ERK1/2                | 0.84           | 0.41               | 0.51           | 0.28               |
| p-AMPK $\alpha$ /AMPK $\alpha$ | 0.02           | 0.02               | 0.00           | 0.18               |

(a) Densitometry Readings/intensity Ratio

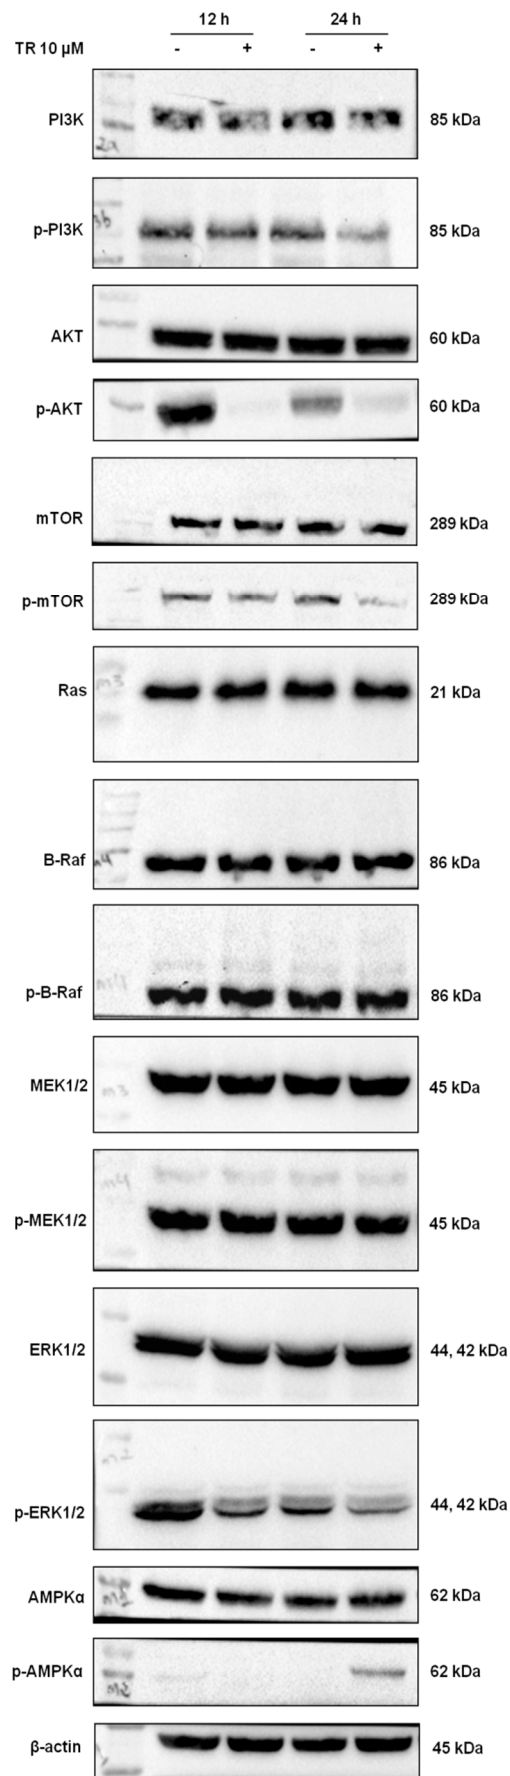

(b)

**Figure S4.** Western blots and densitometry analysis of PI3K/AKT/mTOR, Ras/Raf/MEK/ERK and AMPK signaling pathway in Jurkat cells. Jurkat cells were treated with 10  $\mu$ M TR for 12 and 24 h. An equal amount of protein was fractionated in 12 % polyacrylamide gels and transferred to nitrocellulose membranes. Band intensities of PI3K, p-PI3K (Tyr199/458), AKT, p-AKT (Ser473), mTOR, p-mTOR (Ser2228), Ras, B-Raf, p-B-Raf (Ser445), MEK, p-MEK (Ser217/221), ERK, p-ERK (Thr202/Tyr204), AMPK $\alpha$  and p-AMPK $\alpha$  (Thr172) proteins were analyzed by (a) densitometry readings/intensity ratio, using Image Lab™ software, version 5.0 (Bio-Rad Laboratories, Inc. USA), and were normalized to the corresponding  $\beta$ -actin value and (b) immunoblots, respectively.
